# Supplementary material for: Exploring the Inhibition of Quercetin on Acetylcholinesterase by Multispectroscopic and In Silico Approaches and Evaluation of Its Neuroprotective Effects on PC12 Cells
Source: MDPI journal article supplement (doi:10.3390/molecules27227971), 2022-11-17
Supplement: s1 [file s1]

## Supporting Information

Equation S1

$$F_c = F_m e^{(A_1 + A_2)/2} \quad (S1)$$

Where  $F_c$  and  $F_m$  represent fluorescence intensity values for correction and determination, respectively.  $A_1$  and  $A_2$  represent quercetin's absorbance levels at fluorescence excitation and emission wavelengths, respectively.

Equations S2 – S4

$$\frac{1}{v} = \frac{K_m}{V_{\max}} \left(1 + \frac{[I]}{K_i}\right) \frac{1}{[S]} + \frac{1}{V_{\max}} \left(1 + \frac{[I]}{\alpha K_i}\right) \quad (S2)$$

$$\text{Slop} = \frac{K_m}{V_{\max}} + \frac{K_m [I]}{V_{\max} K_i} \quad (S3)$$

$$\text{Y-intercept} = \frac{1}{V_{\max}^{\text{app}}} = \frac{1}{V_{\max}} + \frac{1}{\alpha K_i V_{\max}} [I] \quad (S4)$$

In these formulas,  $[I]$  represent inhibitor content, whereas  $[S]$  stands for substrate content;  $v$  and  $V_{\max}$  represent enzymatic reaction rate and maximum catalytic reaction rate, respectively;  $K_m$  is the Michaelis–Menten constant;  $K_i$  and  $\alpha K_i$  stand for the equilibrium constants of quercetin binding to the free AChE and AChE–substrate complex, and  $\alpha$  is the apparent coefficient.

Equations S5

$$\frac{F_0}{F} = 1 + K_{sv} [Q] = 1 + K_q \tau_0 [Q] \quad (S5)$$

In the formula,  $F_0$  stands for system fluorescence intensity with AChE alone, whereas  $F$  indicates that with quercetin added, respectively, and  $K_{sv}$  stands for the Stern–Volmer quenching constant, which represents fluorescence quenching efficiency,  $[Q]$  denotes quercetin content,  $K_q$  indicates bimolecular quenching rate constant, whereas  $\tau_0$  denotes the average fluorophore lifetime, about  $10^{-8}$  s.

Equations S6

$$\log \frac{F_0 - F}{F} = n \log K_a - n \log \frac{1}{[Q_t] - \frac{(F_0 - F)[P_t]}{F_0}} \quad (\text{S6})$$

$[Q_t]$  and  $[P_t]$  denote quercetin and AChE concentrations, respectively.  $F_0$  and  $F$  are the same as in Equation S 5.

Equations S7 – S8

$$\log K_a = -\frac{\Delta H^\circ}{2.303RT} + \frac{\Delta S^\circ}{2.303R} \quad (\text{S7})$$

$$\Delta G^\circ = \Delta H^\circ - T\Delta S^\circ \quad (\text{S8})$$

where  $K_a$  and  $R$  suggest binding and gas ( $8.314 \text{ J mol}^{-1} \text{ K}^{-1}$ ) constants, respectively.

Temperature ( $T$ ) was set to 25, 31, and 37 °C.

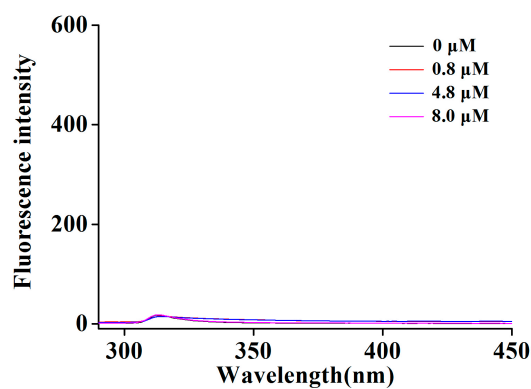

**Figure S1.** Fluorescence spectra of quercetin at varying concentrations (pH 7.6,  $T = 25^\circ\text{C}$ ).  $c(\text{quercetin}) = 0, 0.8, 4.8$  and  $8.0 \mu\text{M}$ , respectively.

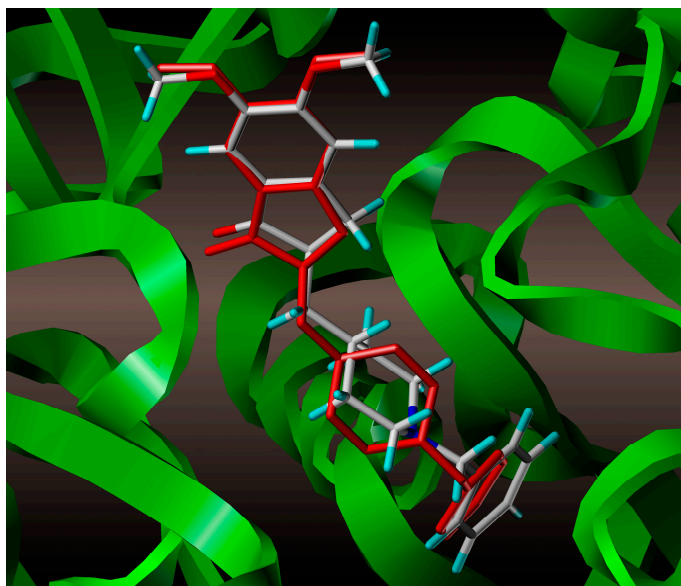

**Figure S2.** Docked conformer of donepezil (white) and original pose of co-crystallized donepezil (red).
